# Supplementary material for: Seasonal variability of PM 2.5 composition and sources in the Klang Valley urban-industrial environment
Source: Copernicus journal article supplement (doi:10.5194/acp-16-5357-2016), 2016-04-29
Supplement: Supplementary file 1 [file acp-2015-515-SUPPLEMENT- 20160415 - without highlights A - without figures.doc]

**Supplementary Information**

**Seasonal Variability of PM2.5 Composition and Sources in the Klang Valley Urban-Industrial Environment**

**Norhaniza Amil1,2, Mohd Talib Latif1,3,*, Md Firoz Khan4 and Maznorizan Mohamad5**

[1]{School of Environmental and Natural Resource Sciences, Faculty of Science and Technology, Universiti Kebangsaan Malaysia, 43600 Bangi, Selangor, Malaysia}

[2]{School of Industrial Technology (Environmental Division), Universiti Sains Malaysia, 11800 Penang, Malaysia}

[3]{Institute for Environmental and Development (LESTARI), Universiti Kebangsaan Malaysia, 43600 Bangi, Selangor, Malaysia}

[4]{Centre for Tropical Climate Change System (IKLIM), Institute of Climate Change, Universiti Kebangsaan Malaysia, 43600 Bangi, Selangor, Malaysia}

[5]{Malaysian Meteorological Department, Headquarter of Malaysian Meteorological Department, Jalan Sultan, 46667 Petaling Jaya, Selangor, Malaysia}

Correspondence to: M. T. Latif([talib@ukm.my](mailto:talib@ukm.my))

**Experimental quality assurance and quality control (QA/QC)**

For filter sampling, the elapsed time indicator (ETI) as well as the flow/pressure recorder chart was operated and checked daily to ensure the quality of sampling. Filter weighing was repeated three times and the average of those three were used for calculation. PM2.5 mass were corrected by deducting the monthly filter blank (FB).

Anion and cation analysis: Using ion chromatography (IC), it was ensured that all ion regression coefficients were better than 0.999 before the sample analysis was begun and that every 15th sample, the QA/QC samples were run, i.e. the ultra-pure water (UPW) and 1 ppm standard prepared the same manner as the samples. These were used as validation tests for the method and the recovery purpose. All lab ware used in the ion analyses was Class A glassware.

Trace element analysis: Two sets of solutions were prepared for two modes of inductively coupled plasma mass spectrometry (ICPMS) analysis as follows: solution (1) 50 mL stock of concentrated solution for lower weight elements; and solution (2) further diluted 1 : 4 (50 mL concentrated: UPW) for heavier weight elements. Four point calibration curves were performed for each mode of analysis as follows: mode (1) 10, 20, 30 and 50 ppb for Ag, As, Cd, Cr, Li, Be, Bi, Cs, Co, Cu,Ga, Mn, Ni, Rb, Se, Sr, U and V; and mode (2) 125, 250, 500 and 1000 ppb for Al, Ba, Fe, Pb and Zn. It was ensured that all element regression coefficients were better than 0.999 before the sample analysis was begun and that every 15th sample, the QA/QC were samples run, i.e. the UPW, 1 ppm multi-element standard and standard reference material (SRM1648a). The reference material was 10 mg of SRM1648a Urban Particulate Matter obtained from NIST (National Institute of Standards and Technology, MD, USA) while 1 ppm Multi-Element Calibration Standard 3 (Perkin Elmer Pure Plus, Perkin-Elmer; USA) both prepared the same manner as the samples to test the recovery and validation of the method. All lab ware used for trace element analyses was Teflon material, except for the syringes.

Table S1. Descriptive statistics of experimental data (meteorological, gaseous and ion parameters); unit: mean ± std (min - max). Remarks:

ud = undetected (below detection limit); SIA = secondary inorganic aerosol; NR = neutralisation ratio = [NH4+] / ([SO42-] + [NO3-]), (eq m-3) (Squizzato et al., 2013); SO2 gas was converted from ppm to µg m-3 assuming 1 ppm = 2619 µg m-3 (25 oC,1 atm).

|  |  | ANNUAL | SW | INT.2 |
| --- | --- | --- | --- | --- |
|  |  | 5 Aug 2011 - 18 July 2012 | 15 May - 14 Sept | 15 Sept - 30 Oct |
| Elements | Unit | n = 81 | n = 29 | n = 7 |
| API | - | 50 ± 16 (29 - 127) | 60 ± 21 (36 - 127) | 49 ± 6 (40 - 59) |
| T | oC | 28.5 ± 1.19 (26.1 - 31.6) | 28.9 ± 1.36 (26.4 - 31.6) | 28.5 ± 1.20 (27.1 - 30.4) |
| RH | % | 71.2 ± 7.91 (50.4 - 86.7) | 68.2 ± 9.22 (50.4 - 86. 7) | 72.9 ± 8.50 (59.7 - 82.7) |
| WS | ms-1 | 1.29 ± 0.194 (0.873 - 1.77) | 1.39 ± 0.187 (0.966 - 1.77) | 1.25 ± 0.198 (1.01 - 1.53) |
| WD | Degree | 129 ± 31.6 (23.1 - 208) | 123 ± 38.0 (23.1 - 205) | 128 ± 22.0 (100 - 167) |
| Rainfall | mm | 10.4 ± 17.5 (0.000 - 85.4) | 6.27 ± 10.6 (0.000 - 34.2) | 8.46 ± 16.9 (0.000 - 45.4) |
|  |  |  |  |  |
| CO | ppm | 1.29 ± 0.31 (0.61 - 2.16) | 1.26 ± 0.32 (0.61 - 1.99) | 1.43 ± 0.32 (1.10 - 1.93) |
| O3 | ppm | 0.012 ± 0.006 (0.000 - 0.029) | 0.010 ± 0.007 (0.000 - 0.025) | 0.017 ± 0.008 (0.010 - 0.029) |
| SO2 | ppm | 0.003 ± 0.001 (0.001 - 0.008) | 0.004 ± 0.002 (0.001 - 0.008) | 0.004 ± 0.001 (0.002 - 0.005) |
| NOX | ppm | 0.062 ± 0.013 (0.028 - 0.109) | 0.057 ± 0.012 (0.028 - 0.076) | 0.072 ± 0.013 (0.059 - 0.091) |
| NO | ppm | 0.030 ± 0.010 (0.008 - 0.067) | 0.025 ± 0.008 (0.008 - 0.041) | 0.033 ± 0.008 (0.025 - 0.047) |
| NO2 | ppm | 0.032 ± 0.007 (0.016 - 0.049) | 0.032 ± 0.007 (0.016 - 0.048) | 0.038 ± 0.006 (0.034 - 0.049) |
|  |  |  |  |  |
| SO42- | µg m-3 | 1.3 ± 0.88 | 1.8 ± 1.2 | 1.6 ± 0.78 |
| ss-SO42- | µg m-3 | 0.076 ± 0.090 | 0.060 ± 0.023 | 0.022 ± 0.0079 |
| nss-SO42- | µg m-3 | 1.3 ± 0.90 | 1.8 ± 1.2 | 1.61 ± 0.79 |
| NO3- | µg m-3 | 0.21 ± 0.13 | 0.19 ± 0.077 | 0.29 ± 0.22 |
| NH4+ | µg m-3 | 0.99 ± 0.85 | 1.5 ± 1.2 | 1.00 ± 0.64 |
| SIA | µg m-3 | 2.4 ± 1.7 | 3.3 ± 2.3 | 2.8 ± 1.6 |
| SIA/PM2.5 | % | 8.5 ± 3.0 | 8.7 ± 3.4 | 9.6 ± 3.0 |
| NR | - | 0.26 | 0.31 | 0.21 |
| SO42-SO2 | µg m-3 | 1.3 - 8.2 | 1.8 - 9.5 | 1.6 - 10 |

Continuation of Table S1 (2)

|  |  | NE | INT.1 | HAZE |
| --- | --- | --- | --- | --- |
|  |  | 1 Nov - 14 Mar | 15 Mar - 14 May |  |
| Elements | Unit | n = 35 | n = 10 | n = 11 |
| API | - | 44 ± 8 (29 - 58) | 45 ± 9 (33 - 58) | 78 ± 22 (49 - 127) |
| T | oC | 28.1 ± 1.02 (26.1 - 30.4) | 28.8 ± 0.78 (27.5 - 30.2) | 29.5 ± 1.33 (26.7 - 31.6) |
| RH | % | 73.6 ± 6.79 (56.5 - 85.5) | 70.5 ± 4.01 (65.1 – 77.0) | 63.0 ± 9.91 (50.4 - 81.6) |
| WS | ms-1 | 1.20 ± 0.167 (0.873 - 1.46) | 1.32 ± 0.18 (1.08 - 1.71) | 1.49 ± 0.138 (1.27 - 1.70) |
| WD | Degree | 132 ± 31.2 (83.2- 208) | 128 ± 25.1 (103 - 178) | 103 ± 33.2 (23.1 - 137) |
| Rainfall | mm | 15.1 ± 22.7 (0.000 - 85.4) | 7.04 ± 9.69 (0.000 – 24.0) | 2.28 ± 5.18 (0.000 - 15.8) |
|  |  |  |  |  |
| CO | ppm | 1.29 ± 0.30 (0.92 - 2.16) | 1.32 ± 0.28 (0.84 - 1.75) | 1.45 ± 0.31 (0.89 - 1.99) |
| O3 | ppm | 0.013 ± 0.005 (0.004 - 0.025) | 0.014 ± 0.004 (0.003 - 0.018) | 0.016 ± 0.004 (0.011 - 0.025) |
| SO2 | ppm | 0.003 ± 0.001 (0.001 – 0.005) | 0.003 ± 0.001 (0.001 – 0.005) | 0.003 ± 0.001 (0.001 - 0.005) |
| NOX | ppm | 0.065 ± 0.014 (0.044 - 0.109) | 0.059 ± 0.011 (0.039 - 0.072) | 0.057 ± 0.013 (0.028 - 0.074) |
| NO | ppm | 0.034 ± 0.010 (0.021 - 0.067) | 0.029 ± 0.008 (0.013 - 0.039) | 0.022 ± 0.008 (0.008 - 0.038) |
| NO2 | ppm | 0.031 ± 0.006 (0.021 - 0.049) | 0.030 ± 0.008 (0.018 - 0.044) | 0.035 ± 0.008 (0.020 - 0.048) |
|  |  |  |  |  |
| SO42- | µg m-3 | 0.98 ± 0.41 | 1.1 ± 0.70 | 2.4 ± 1.2 |
| ss-SO42- | µg m-3 | 0.048 ± 0.029 | 0.16 ± 0.15 | 0.059 ± 0.00 |
| nss-SO42- | µg m-3 | 0.95 ± 0.42 | 0.90 ± 0.60 | 2.4 ± 1.2 |
| NO3- | µg m-3 | 0.19 ± 0.13 | 0.27 ± 0.13 | 0.22 ± 0.14 |
| NH4+ | µg m-3 | 0.65 ± 0.34 | 0.82 ± 0.49 | 2.2 ± 1.5 |
| SIA | µg m-3 | 1.7 ± 0.81 | 2.0 ± 0.88 | 4.7 ± 2.6 |
| SIA/PM2.5 | % | 8.2 ± 2.8 | 8.4 ± 2.3 | 7.5 ± 2.7 |
| NR | - | 0.22 | 0.17 | 0.35 |
| SO42-SO2 | µg m-3 | 0.98 - 6.6 | 1.1 – 8.0 | 2.4 - 9.1 |

Table S2. Statistical compositions of PM2.5 during the one-year period including % recovery for anions and cations using 1 ppm standard of single cation/anion standards; and for trace element using standard reference material (SRM1648a). Remarks: MDL = method detection limit

|  |  |  |  | ANNUAL | | | | |  | SW | | | | |
| --- | --- | --- | --- | --- | --- | --- | --- | --- | --- | --- | --- | --- | --- | --- |
|  |  |  |  | n = 81 | | | | |  | n = 29 | | | | |
|  | Elements | Unit |  | min | max | med | avg | std |  | min | max | med | avg | std |
| 1 | PM2.5 | µg/m3 |  | 6 | 118 | 23 | 28 | 17 |  | 14 | 118 | 29 | 38 | 24 |
| 2 | F- | µg/m3 |  | < MDL | 0.018 | 0.002 | 0.003 | 0.004 |  | < MDL | 0.018 | 0.003 | 0.006 | 0.005 |
| 3 | Cl- | µg/m3 |  | < MDL | 0.141 | 0.016 | 0.026 | 0.026 |  | 0.007 | 0.085 | 0.018 | 0.024 | 0.017 |
| 4 | NO2- | µg/m3 |  | < MDL | 0.009 | 0.004 | 0.004 | 0.002 |  | < MDL | 0.005 | 0.003 | 0.003 | 0.001 |
| 5 | Br- | µg/m3 |  | 0.008 | 0.030 | 0.021 | 0.019 | 0.008 |  | 0.009 | 0.021 | 0.015 | 0.015 | 0.009 |
| 6 | NO3- | µg/m3 |  | 0.076 | 0.616 | 0.177 | 0.213 | 0.127 |  | 0.092 | 0.372 | 0.174 | 0.191 | 0.077 |
| 7 | PO43- | µg/m3 |  | < MDL | 0.205 | 0.072 | 0.079 | 0.063 |  | < MDL | 0.074 | 0.048 | 0.054 | 0.017 |
| 8 | SO42- | µg/m3 |  | 0.139 | 4.155 | 1.093 | 1.328 | 0.885 |  | 0.368 | 4.155 | 1.385 | 1.769 | 1.158 |
| 9 | Na+ | µg/m3 |  | < MDL | 2.113 | 0.218 | 0.300 | 0.357 |  | 0.113 | 0.385 | 0.201 | 0.236 | 0.093 |
| 10 | NH4+ | µg/m3 |  | 0.085 | 5.440 | 0.691 | 0.987 | 0.852 |  | 0.193 | 5.440 | 1.054 | 1.453 | 1.180 |
| 11 | K+ | µg/m3 |  | 0.077 | 0.906 | 0.207 | 0.253 | 0.144 |  | 0.118 | 0.906 | 0.336 | 0.343 | 0.182 |
| 12 | Ca2+ | µg/m3 |  | 0.060 | 0.785 | 0.159 | 0.180 | 0.100 |  | 0.069 | 0.785 | 0.159 | 0.198 | 0.145 |
| 13 | Mg2+ | µg/m3 |  | < MDL | 0.391 | 0.024 | 0.033 | 0.044 |  | 0.015 | 0.115 | 0.029 | 0.035 | 0.021 |
| 14 | Al | µg/m3 |  | < MDL | 7.740 | 0.712 | 1.063 | 1.226 |  | < MDL | 7.740 | 0.974 | 1.723 | 1.973 |
| 15 | Ba | µg/m3 |  | 0.011 | 0.115 | 0.030 | 0.036 | 0.019 |  | 0.014 | 0.115 | 0.027 | 0.040 | 0.025 |
| 16 | Fe | µg/m3 |  | < MDL | 5.245 | 0.879 | 1.000 | 0.706 |  | < MDL | 5.245 | 0.940 | 1.236 | 1.108 |
| 17 | Pb | µg/m3 |  | 0.015 | 0.787 | 0.077 | 0.108 | 0.116 |  | 0.015 | 0.146 | 0.060 | 0.069 | 0.033 |
| 18 | Zn | µg/m3 |  | < MDL | 0.519 | 0.173 | 0.189 | 0.104 |  | < MDL | 0.328 | 0.139 | 0.148 | 0.075 |
| 19 | Ag | ng/m3 |  | < MDL | 0.360 | 0.112 | 0.145 | 0.104 |  | < MDL | 0.221 | 0.152 | 0.152 | 0.097 |
| 20 | As | ng/m3 |  | < MDL | 1.196 | 0.358 | 0.380 | 0.152 |  | < MDL | 0.552 | 0.328 | 0.320 | 0.112 |
| 21 | Cd | ng/m3 |  | 0.031 | 1.002 | 0.092 | 0.125 | 0.136 |  | 0.042 | 0.197 | 0.084 | 0.093 | 0.045 |
| 22 | Cr | ng/m3 |  | < MDL | 32.198 | 2.055 | 3.936 | 6.364 |  | < MDL | 32.198 | 1.386 | 6.227 | 10.279 |
| 23 | Li | ng/m3 |  | < MDL | 0.063 | 0.011 | 0.013 | 0.010 |  | < MDL | 0.063 | 0.010 | 0.014 | 0.015 |
| 24 | Be | ng/m3 |  | < MDL | 0.016 | 0.001 | 0.002 | 0.004 |  | < MDL | 0.007 | 0.001 | 0.002 | 0.002 |
| 25 | Bi | ng/m3 |  | 0.010 | 0.098 | 0.028 | 0.030 | 0.014 |  | 0.010 | 0.055 | 0.026 | 0.027 | 0.009 |
| 26 | Cs | ng/m3 |  | 0.009 | 0.124 | 0.030 | 0.035 | 0.021 |  | 0.012 | 0.096 | 0.035 | 0.039 | 0.022 |
| 27 | Co | ng/m3 |  | 0.004 | 0.117 | 0.012 | 0.015 | 0.014 |  | 0.004 | 0.117 | 0.011 | 0.018 | 0.022 |
| 28 | Cu | ng/m3 |  | 0.290 | 10.984 | 2.083 | 2.740 | 1.890 |  | 0.290 | 10.984 | 1.836 | 2.818 | 2.267 |
| 29 | Ga | ng/m3 |  | 0.020 | 0.135 | 0.042 | 0.048 | 0.024 |  | 0.021 | 0.135 | 0.054 | 0.057 | 0.031 |
| 30 | Mn | ng/m3 |  | < MDL | 3.841 | 0.822 | 0.934 | 0.643 |  | < MDL | 3.841 | 0.782 | 0.986 | 0.765 |
| 31 | Ni | ng/m3 |  | < MDL | 3.126 | 0.391 | 0.480 | 0.469 |  | 0.137 | 1.960 | 0.430 | 0.538 | 0.358 |
| 32 | Rb | ng/m3 |  | 0.349 | 3.185 | 0.865 | 1.008 | 0.501 |  | 0.443 | 3.185 | 1.188 | 1.251 | 0.653 |
| 33 | Se | ng/m3 |  | < MDL | 0.386 | 0.087 | 0.107 | 0.071 |  | < MDL | 0.386 | 0.126 | 0.132 | 0.096 |
| 34 | Sr | ng/m3 |  | < MDL | 1.192 | 0.201 | 0.265 | 0.223 |  | < MDL | 1.192 | 0.285 | 0.342 | 0.298 |
| 35 | U | ng/m3 |  | < MDL | 0.021 | 0.002 | 0.003 | 0.003 |  | < MDL | 0.010 | 0.002 | 0.003 | 0.002 |
| 36 | V | ng/m3 |  | < MDL | 2.743 | 0.790 | 0.915 | 0.556 |  | < MDL | 2.640 | 0.836 | 0.951 | 0.595 |
| 37 | BC | µg/m3 |  | 2.548 | 5.548 | 4.248 | 4.155 | 0.642 |  | 2.974 | 5.167 | 4.248 | 4.155 | 0.581 |
|  |  |  |  |  |  |  |  |  |  |  |  |  |  |  |

Continuation of Table S2 (2)

|  |  |  |  | INT.2 | | | | |  | NE | | | | |
| --- | --- | --- | --- | --- | --- | --- | --- | --- | --- | --- | --- | --- | --- | --- |
|  |  |  |  | n = 7 | | | | |  | n = 35 | | | | |
|  | Elements | Unit |  | min | max | med | avg | std |  | min | max | med | avg | std |
| 1 | PM2.5 | µg/m3 |  | 10 | 50 | 27 | 29 | 12 |  | 6 | 35 | 20 | 21 | 6 |
| 2 | F- | µg/m3 |  | < MDL | 0.015 | 0.002 | 0.005 | 0.006 |  | < MDL | 0.006 | 0.001 | 0.002 | 0.001 |
| 3 | Cl- | µg/m3 |  | < MDL | 0.077 | 0.012 | 0.027 | 0.031 |  | < MDL | 0.141 | 0.014 | 0.027 | 0.032 |
| 4 | NO2- | µg/m3 |  | < MDL | 0.009 | 0.006 | 0.006 | 0.002 |  | < MDL | 0.007 | 0.004 | 0.004 | 0.001 |
| 5 | Br- | µg/m3 |  | n/d | n/d | n/d | n/d | n/d |  | 0.008 | 0.028 | 0.016 | 0.017 | 0.008 |
| 6 | NO3- | µg/m3 |  | 0.114 | 0.608 | 0.219 | 0.290 | 0.218 |  | 0.076 | 0.616 | 0.141 | 0.188 | 0.126 |
| 7 | PO43- | µg/m3 |  | < MDL | 0.020 | 0.014 | 0.013 | 0.007 |  | 0.010 | 0.205 | 0.165 | 0.113 | 0.082 |
| 8 | SO42- | µg/m3 |  | 0.756 | 3.104 | 1.399 | 1.618 | 0.782 |  | 0.139 | 1.673 | 0.942 | 0.981 | 0.414 |
| 9 | Na+ | µg/m3 |  | < MDL | 0.108 | 0.085 | 0.085 | 0.031 |  | < MDL | 0.399 | 0.134 | 0.189 | 0.115 |
| 10 | NH4+ | µg/m3 |  | 0.448 | 2.331 | 0.741 | 1.004 | 0.636 |  | 0.085 | 1.680 | 0.597 | 0.645 | 0.336 |
| 11 | K+ | µg/m3 |  | 0.104 | 0.482 | 0.240 | 0.258 | 0.124 |  | 0.077 | 0.357 | 0.194 | 0.195 | 0.076 |
| 12 | Ca2+ | µg/m3 |  | 0.110 | 0.227 | 0.164 | 0.171 | 0.044 |  | 0.061 | 0.340 | 0.151 | 0.161 | 0.064 |
| 13 | Mg2+ | µg/m3 |  | 0.019 | 0.027 | 0.024 | 0.024 | 0.002 |  | < MDL | 0.036 | 0.018 | 0.019 | 0.008 |
| 14 | Al | µg/m3 |  | < MDL | 2.263 | 1.268 | 1.121 | 0.897 |  | < MDL | 1.757 | 0.721 | 0.806 | 0.387 |
| 15 | Ba | µg/m3 |  | 0.011 | 0.080 | 0.037 | 0.042 | 0.021 |  | 0.017 | 0.093 | 0.029 | 0.032 | 0.014 |
| 16 | Fe | µg/m3 |  | 0.480 | 1.649 | 0.989 | 1.069 | 0.481 |  | 0.358 | 1.221 | 0.796 | 0.811 | 0.222 |
| 17 | Pb | µg/m3 |  | 0.041 | 0.787 | 0.126 | 0.220 | 0.265 |  | 0.032 | 0.661 | 0.084 | 0.118 | 0.114 |
| 18 | Zn | µg/m3 |  | 0.112 | 0.515 | 0.330 | 0.300 | 0.152 |  | < MDL | 0.519 | 0.187 | 0.212 | 0.099 |
| 19 | Ag | ng/m3 |  | n/d | n/d | n/d | n/d | n/d |  | < MDL | 0.360 | 0.095 | 0.139 | 0.116 |
| 20 | As | ng/m3 |  | 0.235 | 0.638 | 0.445 | 0.437 | 0.131 |  | 0.212 | 1.196 | 0.421 | 0.433 | 0.177 |
| 21 | Cd | ng/m3 |  | 0.031 | 1.002 | 0.144 | 0.238 | 0.340 |  | 0.041 | 0.630 | 0.099 | 0.141 | 0.127 |
| 22 | Cr | ng/m3 |  | < MDL | 4.081 | 2.392 | 2.500 | 1.295 |  | < MDL | 5.034 | 1.560 | 1.924 | 1.745 |
| 23 | Li | ng/m3 |  | < MDL | 0.023 | 0.011 | 0.012 | 0.009 |  | < MDL | 0.032 | 0.011 | 0.012 | 0.007 |
| 24 | Be | ng/m3 |  | 0.001 | 0.002 | 0.001 | 0.001 | 0.001 |  | < MDL | 0.016 | 0.000 | 0.004 | 0.008 |
| 25 | Bi | ng/m3 |  | 0.015 | 0.055 | 0.038 | 0.039 | 0.014 |  | 0.012 | 0.098 | 0.029 | 0.032 | 0.018 |
| 26 | Cs | ng/m3 |  | 0.015 | 0.059 | 0.041 | 0.037 | 0.017 |  | 0.009 | 0.124 | 0.030 | 0.035 | 0.024 |
| 27 | Co | ng/m3 |  | 0.006 | 0.024 | 0.017 | 0.017 | 0.007 |  | 0.005 | 0.044 | 0.011 | 0.012 | 0.007 |
| 28 | Cu | ng/m3 |  | 0.593 | 4.718 | 1.999 | 2.542 | 1.556 |  | 0.969 | 10.188 | 2.223 | 2.835 | 1.845 |
| 29 | Ga | ng/m3 |  | 0.020 | 0.104 | 0.057 | 0.059 | 0.027 |  | 0.022 | 0.106 | 0.041 | 0.042 | 0.016 |
| 30 | Mn | ng/m3 |  | < MDL | 2.436 | 1.409 | 1.339 | 0.793 |  | < MDL | 1.438 | 0.862 | 0.811 | 0.324 |
| 31 | Ni | ng/m3 |  | 0.358 | 0.747 | 0.544 | 0.550 | 0.147 |  | < MDL | 3.126 | 0.286 | 0.427 | 0.615 |
| 32 | Rb | ng/m3 |  | 0.575 | 1.756 | 1.180 | 1.149 | 0.467 |  | 0.349 | 1.427 | 0.827 | 0.849 | 0.305 |
| 33 | Se | ng/m3 |  | 0.049 | 0.192 | 0.112 | 0.115 | 0.052 |  | < MDL | 0.242 | 0.096 | 0.098 | 0.051 |
| 34 | Sr | ng/m3 |  | < MDL | 1.070 | 0.242 | 0.338 | 0.331 |  | < MDL | 0.542 | 0.199 | 0.227 | 0.111 |
| 35 | U | ng/m3 |  | < MDL | 0.007 | 0.004 | 0.003 | 0.002 |  | < MDL | 0.021 | 0.002 | 0.003 | 0.003 |
| 36 | V | ng/m3 |  | 0.790 | 2.024 | 1.314 | 1.299 | 0.421 |  | 0.157 | 1.470 | 0.654 | 0.731 | 0.366 |
| 37 | BC | µg/m3 |  | 2.548 | 5.548 | 4.480 | 4.333 | 0.952 |  | 3.056 | 5.524 | 4.213 | 4.201 | 0.615 |
|  |  |  |  |  |  |  |  |  |  |  |  |  |  |  |

Continuation of Table S2 (3)

|  |  |  |  | INT.1 | | | | |  | HAZE | | | | | % Recovery |
| --- | --- | --- | --- | --- | --- | --- | --- | --- | --- | --- | --- | --- | --- | --- | --- |
|  |  |  |  | n = 10 | | | | |  | n = 11 | | | | |
|  | Elements | Unit |  | min | max | med | avg | std |  | min | max | med | avg | std |
| 1 | PM2.5 | µg/m3 |  | 14 | 39 | 22 | 23 | 8 |  | 40 | 118 | 54 | 61 | 24 |  |
| 2 | F- | µg/m3 |  | < MDL | 0.011 | 0.004 | 0.004 | 0.004 |  | 0.003 | 0.018 | 0.011 | 0.011 | 0.006 | 105 |
| 3 | Cl- | µg/m3 |  | 0.007 | 0.072 | 0.018 | 0.027 | 0.021 |  | 0.007 | 0.085 | 0.021 | 0.030 | 0.022 | 112 |
| 4 | NO2- | µg/m3 |  | < MDL | 0.003 | 0.003 | 0.003 | 0.000 |  | 0.003 | 0.004 | 0.004 | 0.004 | 0.001 | 107 |
| 5 | Br- | µg/m3 |  | 0.025 | 0.030 | 0.028 | 0.028 | 0.002 |  | n/d | n/d | n/d | n/d | n/d | 99 |
| 6 | NO3- | µg/m3 |  | 0.170 | 0.559 | 0.215 | 0.267 | 0.125 |  | 0.092 | 0.372 | 0.194 | 0.219 | 0.142 | 131 |
| 7 | PO43- | µg/m3 |  | < MDL | 0.114 | 0.075 | 0.080 | 0.014 |  | n/d | n/d | n/d | n/d | n/d | 103 |
| 8 | SO42- | µg/m3 |  | 0.269 | 2.631 | 0.949 | 1.057 | 0.698 |  | 0.719 | 4.155 | 2.276 | 2.403 | 1.235 | 106 |
| 9 | Na+ | µg/m3 |  | 0.343 | 2.113 | 0.367 | 0.637 | 0.611 |  | 0.233 | 0.233 | 0.233 | 0.233 | 0.000 | 110 |
| 10 | NH4+ | µg/m3 |  | 0.245 | 1.591 | 0.769 | 0.821 | 0.485 |  | 0.541 | 5.440 | 1.999 | 2.211 | 1.468 | 86 |
| 11 | K+ | µg/m3 |  | 0.087 | 0.290 | 0.176 | 0.181 | 0.063 |  | 0.336 | 0.906 | 0.452 | 0.507 | 0.171 | 96 |
| 12 | Ca2+ | µg/m3 |  | 0.060 | 0.259 | 0.211 | 0.196 | 0.062 |  | 0.124 | 0.785 | 0.170 | 0.282 | 0.206 | 93 |
| 13 | Mg2+ | µg/m3 |  | 0.015 | 0.391 | 0.048 | 0.081 | 0.111 |  | 0.028 | 0.115 | 0.042 | 0.050 | 0.027 | 98 |
| 14 | Al | µg/m3 |  | 0.025 | 0.990 | 0.387 | 0.408 | 0.292 |  | < MDL | 7.740 | 2.050 | 2.788 | 2.564 | 36 |
| 15 | Ba | µg/m3 |  | 0.018 | 0.052 | 0.032 | 0.033 | 0.011 |  | 0.022 | 0.115 | 0.043 | 0.046 | 0.026 |  |
| 16 | Fe | µg/m3 |  | 0.511 | 1.452 | 0.900 | 0.980 | 0.355 |  | 0.371 | 5.245 | 1.351 | 1.897 | 1.500 | 69 |
| 17 | Pb | µg/m3 |  | 0.045 | 0.293 | 0.090 | 0.108 | 0.069 |  | 0.059 | 0.146 | 0.095 | 0.094 | 0.030 | 101 |
| 18 | Zn | µg/m3 |  | 0.050 | 0.256 | 0.142 | 0.137 | 0.065 |  | < MDL | 0.328 | 0.185 | 0.175 | 0.088 | 69 |
| 19 | Ag | ng/m3 |  | < MDL | 0.249 | 0.176 | 0.161 | 0.096 |  | n/d | n/d | n/d | n/d | n/d | 74 |
| 20 | As | ng/m3 |  | 0.211 | 0.454 | 0.313 | 0.326 | 0.093 |  | 0.214 | 0.428 | 0.328 | 0.337 | 0.065 | 51 |
| 21 | Cd | ng/m3 |  | 0.034 | 0.135 | 0.075 | 0.080 | 0.033 |  | 0.051 | 0.197 | 0.139 | 0.130 | 0.047 | 47 |
| 22 | Cr | ng/m3 |  | < MDL | 10.545 | 2.865 | 3.370 | 3.063 |  | < MDL | 4.214 | 2.866 | 2.866 | 1.907 | 17 |
| 23 | Li | ng/m3 |  | < MDL | 0.030 | 0.014 | 0.015 | 0.006 |  | 0.002 | 0.063 | 0.010 | 0.021 | 0.021 |  |
| 24 | Be | ng/m3 |  | 0.001 | 0.001 | 0.001 | 0.001 | 0.000 |  | 0.275 | 2.484 | 1.395 | 1.456 | 0.749 |  |
| 25 | Bi | ng/m3 |  | 0.010 | 0.035 | 0.026 | 0.023 | 0.008 |  | 0.017 | 0.042 | 0.027 | 0.028 | 0.008 |  |
| 26 | Cs | ng/m3 |  | 0.013 | 0.054 | 0.025 | 0.026 | 0.012 |  | 0.033 | 0.096 | 0.059 | 0.060 | 0.019 | 38 |
| 27 | Co | ng/m3 |  | 0.005 | 0.025 | 0.012 | 0.015 | 0.006 |  | 0.004 | 0.117 | 0.018 | 0.029 | 0.032 | 60 |
| 28 | Cu | ng/m3 |  | 1.468 | 4.383 | 2.040 | 2.323 | 1.002 |  | 1.517 | 6.840 | 3.264 | 3.491 | 1.962 | 65 |
| 29 | Ga | ng/m3 |  | 0.021 | 0.062 | 0.033 | 0.038 | 0.013 |  | 0.024 | 0.135 | 0.057 | 0.056 | 0.032 |  |
| 30 | Mn | ng/m3 |  | 0.222 | 2.932 | 0.578 | 0.937 | 0.930 |  | < MDL | 3.841 | 1.113 | 1.388 | 1.064 | 72 |
| 31 | Ni | ng/m3 |  | < MDL | 0.928 | 0.402 | 0.456 | 0.283 |  | 0.196 | 1.960 | 0.425 | 0.588 | 0.496 | 65 |
| 32 | Rb | ng/m3 |  | 0.379 | 1.324 | 0.818 | 0.785 | 0.282 |  | 1.048 | 3.185 | 1.733 | 1.777 | 0.612 | 29 |
| 33 | Se | ng/m3 |  | < MDL | 0.087 | 0.058 | 0.055 | 0.026 |  | 0.066 | 0.386 | 0.203 | 0.207 | 0.085 | 42 |
| 34 | Sr | ng/m3 |  | < MDL | 0.228 | 0.133 | 0.132 | 0.058 |  | < MDL | 1.192 | 0.311 | 0.456 | 0.386 | 58 |
| 35 | U | ng/m3 |  | 0.001 | 0.004 | 0.002 | 0.002 | 0.001 |  | 0.515 | 9.890 | 2.730 | 3.820 | 2.829 |  |
| 36 | V | ng/m3 |  | 0.240 | 2.743 | 1.035 | 1.186 | 0.832 |  | 0.612 | 2.640 | 0.841 | 1.024 | 0.574 | 64 |
| 37 | BC | µg/m3 |  | 3.091 | 4.799 | 3.591 | 3.865 | 0.676 |  | 4.202 | 5.167 | 4.529 | 4.611 | 0.332 |  |
|  |  |  |  |  |  |  |  |  |  |  |  |  |  |  |  |

Table S3. The input variables during the execution of PMF 5.0 procedure for the apportionment of PM2.5 sources

|  | | | | | | | | | |
| --- | --- | --- | --- | --- | --- | --- | --- | --- | --- |
| Sequence  Number | Seed | Q robust | Q true | Q theory | Q true/Qexp | Extra  Uncertainty  (%) | Number  of factor | Standard  Error | R2 |
| 1 | 1 | 1581.27 | 1581.27 | 1925 | 0.93843919 | 5 | 5 | 4.547911 | 0.887934 |
| 2 | 2 | 1581.27 | 1581.27 | 1925 | 0.93843919 | 5 | 5 | 4.548350 | 0.887933 |
| 3 | 3 | 1581.26 | 1581.26 | 1925 | 0.93843323 | 5 | 5 | 4.549417 | 0.887884 |
| 4 | 4 | 1581.27 | 1581.27 | 1925 | 0.93843919 | 5 | 5 | 4.547655 | 0.887952 |
| 5 | 5 | 1581.27 | 1581.27 | 1925 | 0.93843919 | 5 | 5 | 4.547842 | 0.887945 |
| 6 | 6 | 1581.26 | 1581.26 | 1925 | 0.93843323 | 5 | 5 | 4.548071 | 0.887947 |
| 7 | 7 | 1581.26 | 1581.26 | 1925 | 0.93843323 | 5 | 5 | 4.547759 | 0.887944 |
| 8 | 8 | 1581.27 | 1581.26 | 1925 | 0.93843323 | 5 | 5 | 4.548212 | 0.887924 |
| 9 | 9 | 1581.27 | 1581.27 | 1925 | 0.93843919 | 5 | 5 | 4.547940 | 0.887949 |

Table S4. Seasonal results of Pearson correlation matrices between PM2.5 mass, chemical mass closure (CMC) components and positive matrix factorisation (PMF) factors identified towards: a) meteorological parameters, and b) gaseous parameters. Remarks: BC = black carbon while PMF factors were: factor 1= combustion of engine oil; factor 2= mineral dust; factor 3= mixed secondary inorganic aerosol (SIA) and biomass burning; factor 4= mixed traffic and industrial; and factor 5= sea salt. For meteorological parameters, API is air pollution index; T = temperature; RH = relative humidity; WS = wind speed; and WD = wind direction.

| a) | Variables | ANNUAL | SW | INT.2 | NE | INT.1 | HAZE |  |  | Variables | ANNUAL | SW | INT.2 | NE | INT.1 | HAZE |
| --- | --- | --- | --- | --- | --- | --- | --- | --- | --- | --- | --- | --- | --- | --- | --- | --- |
| API | PM2.5 mass | **0.763** | **0.748** | 0.299 | **0.473** | **0.705** | 0.531 |  | WS | PM2.5 mass | **0.274** | 0.164 | 0.245 | -0.030 | 0.192 | -0.446 |
|  | CMC SO42- | **0.629** | **0.565** | 0.683 | **0.469** | 0.585 | 0.480 |  |  | CMC SO42- | 0.174 | -0.047 | -0.125 | 0.224 | 0.208 | **-0.692** |
|  | CMC NO3- | -0.172 | -0.350 | 0.370 | 0.079 | 0.623 | -0.175 |  |  | CMC NO3- | -0.113 | 0.161 | 0.378 | **-0.429** | -0.055 | **0.719** |
|  | CMC NH4+ | **0.712** | **0.667** | 0.750 | **0.561** | 0.460 | **0.606** |  |  | CMC NH4+ | 0.140 | 0.015 | -0.103 | -0.034 | -0.421 | -0.530 |
|  | CMC Sea salt | -0.087 | -0.294 | 0.214 | -0.088 | 0.547 | -0.102 |  |  | CMC Sea salt | 0.013 | 0.007 | -0.035 | 0.241 | -0.195 | 0.111 |
|  | CMC Dust | **0.227** | 0.220 | -0.033 | -0.101 | 0.302 | -0.114 |  |  | CMC Dust | **0.385** | **0.421** | 0.588 | **0.408** | -0.154 | 0.430 |
|  | CMC BC | **0.353** | **0.580** | 0.046 | 0.234 | **0.772** | 0.274 |  |  | CMC BC | -0.070 | 0.162 | 0.445 | **-0.403** | -0.034 | -0.060 |
|  | PMF Factor 1 | 0.133 | -0.062 | -0.084 | **0.366** | -0.313 | 0.076 |  |  | PMF Factor 1 | 0.084 | -0.066 | -0.599 | 0.107 | 0.557 | 0.104 |
|  | PMF Factor 2 | **0.354** | 0.275 | -0.041 | -0.103 | 0.325 | 0.005 |  |  | PMF Factor 2 | **0.429** | **0.456** | 0.875 | **0.401** | 0.249 | 0.494 |
|  | PMF Factor 3 | **0.725** | **0.716** | **0.767** | 0.158 | **0.817** | 0.476 |  |  | PMF Factor 3 | 0.213 | 0.107 | 0.182 | -0.186 | 0.228 | **-0.678** |
|  | PMF Factor 4 | **-0.235** | 0.081 | -0.006 | -0.169 | 0.416 | 0.014 |  |  | PMF Factor 4 | **-0.391** | 0.155 | 0.378 | **-0.507** | 0.628 | 0.138 |
|  | PMF Factor 5 | 0.011 | -0.079 | -0.279 | -0.025 | 0.612 | -0.124 |  |  | PMF Factor 5 | 0.132 | 0.048 | 0.128 | 0.144 | -0.267 | 0.306 |
| T | PM2.5 mass | **0.310** | 0.236 | 0.572 | 0.201 | 0.030 | -0.050 |  | WD | PM2.5 mass | -0.131 | -0.181 | 0.409 | 0.056 | 0.047 | 0.413 |
|  | CMC SO42- | 0.149 | -0.063 | 0.089 | **0.414** | 0.112 | -0.547 |  |  | CMC SO42- | -0.054 | -0.006 | 0.047 | 0.083 | -0.029 | 0.162 |
|  | CMC NO3- | 0.052 | 0.194 | 0.521 | -0.151 | -0.097 | 0.384 |  |  | CMC NO3- | 0.002 | 0.170 | 0.471 | -0.226 | -0.124 | 0.451 |
|  | CMC NH4+ | 0.145 | 0.046 | 0.087 | 0.176 | -0.542 | -0.259 |  |  | CMC NH4+ | -0.105 | -0.012 | 0.034 | -0.029 | -0.524 | 0.319 |
|  | CMC Sea salt | 0.155 | **0.407** | 0.128 | **0.379** | 0.008 | 0.562 |  |  | CMC Sea salt | 0.096 | 0.064 | -0.190 | 0.309 | 0.145 | -0.039 |
|  | CMC Dust | **0.576** | **0.641** | 0.692 | **0.581** | -0.216 | **0.761** |  |  | CMC Dust | 0.014 | -0.085 | 0.625 | **0.406** | **-0.699** | 0.197 |
|  | CMC BC | -0.023 | 0.188 | 0.689 | **-0.421** | -0.079 | 0.489 |  |  | CMC BC | -0.063 | -0.130 | 0.579 | -0.113 | -0.172 | 0.381 |
|  | PMF Factor 1 | 0.063 | 0.022 | -0.393 | 0.083 | -0.110 | 0.086 |  |  | PMF Factor 1 | 0.205 | **0.581** | 0.129 | -0.147 | -0.15 | **0.677** |
|  | PMF Factor 2 | **0.599** | **0.673** | 0.703 | **0.464** | 0.734 | **0.789** |  |  | PMF Factor 2 | -0.016 | -0.011 | 0.354 | **0.373** | -0.195 | 0.319 |
|  | PMF Factor 3 | **0.236** | 0.229 | 0.342 | 0.177 | -0.184 | -0.094 |  |  | PMF Factor 3 | -0.161 | -0.257 | -0.045 | 0.144 | 0.633 | 0.259 |
|  | PMF Factor 4 | -0.189 | 0.122 | 0.709 | -0.280 | 0.403 | 0.089 |  |  | PMF Factor 4 | 0.163 | -0.185 | 0.638 | 0.048 | 0.464 | 0.161 |
|  | PMF Factor 5 | 0.213 | 0.313 | 0.140 | 0.163 | -0.405 | **0.687** |  |  | PMF Factor 5 | -0.067 | -0.152 | 0.339 | 0.121 | -0.312 | -0.011 |
| RH | PM2.5 mass | **-0.314** | -0.252 | -0.495 | -0.174 | 0.152 | 0.108 |  | Rainfall | PM2.5 mass | -0.212 | -0.246 | -0.733 | -0.052 | -0.051 | -0.178 |
|  | CMC SO42- | -0.054 | 0.186 | -0.007 | **-0.352** | 0.148 | **0.646** |  |  | CMC SO42- | -0.136 | -0.133 | -0.422 | 0.025 | 0.001 | 0.236 |
|  | CMC NO3- | -0.035 | -0.358 | -0.489 | 0.231 | 0.338 | -0.534 |  |  | CMC NO3- | -0.030 | -0.030 | -0.414 | 0.037 | 0.079 | -0.257 |
|  | CMC NH4+ | -0.112 | 0.011 | -0.010 | -0.113 | 0.504 | 0.332 |  |  | CMC NH4+ | -0.092 | -0.188 | -0.335 | 0.207 | 0.618 | 0.012 |
|  | CMC Sea salt | -0.117 | **-0.379** | -0.097 | **-0.519** | 0.227 | -0.461 |  |  | CMC Sea salt | -0.106 | -0.274 | 0.109 | -0.093 | -0.251 | -0.213 |
|  | CMC Dust | **-0.615** | **-0.716** | -0.697 | **-0.543** | 0.437 | **-0.742** |  |  | CMC Dust | **-0.228** | -0.353 | -0.296 | -0.265 | 0.551 | -0.391 |
|  | CMC BC | 0.022 | -0.189 | -0.640 | **0.396** | 0.228 | -0.472 |  |  | CMC BC | -0.116 | -0.141 | **-0.893** | -0.029 | 0.027 | -0.591 |
|  | PMF Factor 1 | 0.056 | 0.186 | 0.439 | -0.116 | 0.139 | -0.039 |  |  | PMF Factor 1 | -0.037 | -0.084 | -0.291 | 0.191 | 0.530 | 0.064 |
|  | PMF Factor 2 | **-0.652** | **-0.738** | -0.778 | **-0.547** | -0.600 | **-0.759** |  |  | PMF Factor 2 | **-0.257** | -0.184 | -0.156 | **-0.513** | -0.581 | -0.399 |
|  | PMF Factor 3 | -0.226 | -0.192 | -0.275 | -0.111 | 0.053 | 0.229 |  |  | PMF Factor 3 | -0.207 | -0.227 | -0.227 | -0.265 | 0.047 | -0.097 |
|  | PMF Factor 4 | 0.212 | -0.219 | -0.655 | 0.334 | -0.567 | -0.205 |  |  | PMF Factor 4 | -0.110 | -0.102 | -0.743 | -0.296 | -0.524 | -0.343 |
|  | PMF Factor 5 | -0.220 | -0.353 | -0.131 | -0.219 | 0.600 | -0.570 |  |  | PMF Factor 5 | -0.050 | -0.128 | **-0.816** | 0.144 | 0.338 | -0.101 |

Continuation of Table S4 (2)

| b) | Variables | ANNUAL | SW | INT.2 | NE | INT.1 | HAZE |  |  | Variables | ANNUAL | SW | INT.2 | NE | INT.1 | HAZE |
| --- | --- | --- | --- | --- | --- | --- | --- | --- | --- | --- | --- | --- | --- | --- | --- | --- |
| CO | PM2.5 mass | **0.471** | **0.687** | 0.713 | **0.488** | **0.654** | **0.749** |  | NOX | PM2.5 mass | 0.058 | 0.112 | **0.800** | **0.380** | 0.588 | 0.192 |
|  | CMC SO42- | **0.455** | **0.579** | **0.793** | **0.428** | 0.582 | 0.412 |  |  | CMC SO42- | 0.050 | 0.038 | 0.709 | 0.180 | 0.492 | -0.333 |
|  | CMC NO3- | 0.171 | -0.292 | 0.334 | 0.296 | **0.687** | 0.014 |  |  | CMC NO3- | **0.284** | 0.085 | 0.545 | 0.295 | 0.609 | 0.429 |
|  | CMC NH4+ | **0.462** | **0.664** | 0.711 | **0.576** | 0.177 | **0.674** |  |  | CMC NH4+ | 0.050 | 0.127 | 0.663 | **0.351** | 0.226 | 0.030 |
|  | CMC Sea salt | 0.020 | -0.273 | -0.085 | **-0.482** | 0.626 | 0.107 |  |  | CMC Sea salt | -0.063 | -0.04 | 0.005 | **-0.527** | 0.472 | 0.307 |
|  | CMC Dust | 0.060 | 0.232 | 0.001 | -0.285 | 0.331 | 0.205 |  |  | CMC Dust | -0.019 | 0.244 | 0.364 | **-0.419** | 0.358 | 0.589 |
|  | CMC BC | **0.549** | **0.533** | 0.554 | **0.544** | **0.748** | **0.697** |  |  | CMC BC | **0.467** | 0.122 | 0.642 | **0.621** | **0.724** | 0.588 |
|  | PMF Factor 1 | 0.206 | 0.134 | 0.722 | **0.498** | -0.167 | 0.306 |  |  | PMF Factor 1 | 0.170 | 0.218 | 0.482 | **0.471** | -0.043 | 0.158 |
|  | PMF Factor 2 | 0.197 | **0.455** | -0.637 | -0.295 | 0.198 | 0.322 |  |  | PMF Factor 2 | 0.122 | **0.504** | -0.449 | -0.280 | 0.081 | **0.650** |
|  | PMF Factor 3 | **0.302** | **0.612** | 0.420 | -0.083 | 0.072 | 0.600 |  |  | PMF Factor 3 | -0.139 | 0.014 | 0.504 | -0.220 | 0.000 | 0.120 |
|  | PMF Factor 4 | 0.199 | 0.157 | 0.577 | 0.040 | -0.015 | 0.007 |  |  | PMF Factor 4 | **0.459** | 0.186 | **0.774** | 0.219 | -0.007 | 0.239 |
|  | PMF Factor 5 | -0.025 | -0.163 | 0.438 | -0.167 | **0.694** | 0.010 |  |  | PMF Factor 5 | -0.122 | 0.029 | 0.180 | -0.288 | **0.643** | 0.362 |
| O3 | PM2.5 mass | **0.298** | **0.535** | 0.427 | **0.433** | 0.378 | 0.449 |  | NO | PM2.5 mass | **-0.262** | -0.309 | 0.701 | 0.086 | -0.126 | -0.285 |
|  | CMC SO42- | 0.198 | 0.191 | 0.674 | **0.531** | 0.239 | **0.803** |  |  | CMC SO42- | **-0.252** | -0.270 | 0.573 | -0.088 | -0.227 | **-0.702** |
|  | CMC NO3- | 0.079 | 0.032 | -0.055 | -0.087 | 0.345 | -0.413 |  |  | CMC NO3- | 0.185 | 0.177 | 0.353 | 0.126 | -0.006 | 0.432 |
|  | CMC NH4+ | **0.241** | 0.343 | 0.553 | **0.521** | 0.627 | **0.685** |  |  | CMC NH4+ | **-0.243** | -0.285 | 0.491 | 0.053 | 0.134 | -0.475 |
|  | CMC Sea salt | 0.121 | -0.014 | -0.210 | 0.333 | 0.237 | -0.332 |  |  | CMC Sea salt | -0.062 | 0.215 | -0.073 | **-0.475** | 0.013 | 0.434 |
|  | CMC Dust | 0.115 | 0.193 | -0.467 | 0.207 | 0.316 | -0.532 |  |  | CMC Dust | -0.124 | 0.159 | 0.225 | **-0.469** | -0.013 | **0.687** |
|  | CMC BC | 0.049 | 0.131 | 0.316 | -0.263 | 0.454 | -0.071 |  |  | CMC BC | **0.237** | -0.207 | 0.583 | **0.472** | 0.142 | 0.274 |
|  | PMF Factor 1 | **-0.287** | **-0.605** | **0.796** | 0.118 | 0.040 | 0.358 |  |  | PMF Factor 1 | 0.083 | 0.247 | 0.651 | 0.326 | -0.246 | 0.050 |
|  | PMF Factor 2 | -0.009 | 0.105 | -0.832 | -0.007 | -0.434 | -0.427 |  |  | PMF Factor 2 | -0.034 | 0.369 | -0.629 | -0.247 | -0.360 | **0.698** |
|  | PMF Factor 3 | **0.304** | **0.597** | 0.204 | **0.383** | 0.703 | 0.538 |  |  | PMF Factor 3 | **-0.390** | -0.376 | 0.263 | -0.343 | -0.476 | -0.282 |
|  | PMF Factor 4 | 0.035 | 0.024 | 0.188 | **-0.351** | 0.126 | -0.122 |  |  | PMF Factor 4 | **0.428** | 0.028 | 0.719 | 0.195 | -0.370 | 0.239 |
|  | PMF Factor 5 | 0.147 | 0.113 | 0.638 | 0.305 | 0.509 | -0.379 |  |  | PMF Factor 5 | -0.118 | 0.181 | 0.327 | -0.325 | 0.188 | 0.589 |
| SO2 | PM2.5 mass | **0.324** | 0.141 | -0.250 | **0.654** | 0.627 | 0.445 |  | NO2 | PM2.5 mass | **0.473** | **0.528** | **0.851** | **0.711** | **0.874** | 0.599 |
|  | CMC SO42- | **0.345** | 0.201 | -0.559 | **0.407** | **0.670** | -0.017 |  |  | CMC SO42- | **0.444** | 0.359 | **0.819** | **0.545** | **0.846** | 0.155 |
|  | CMC NO3- | 0.030 | 0.009 | 0.041 | 0.061 | 0.523 | 0.193 |  |  | CMC NO3- | **0.287** | -0.052 | 0.751 | **0.454** | **0.778** | 0.269 |
|  | CMC NH4+ | **0.310** | 0.267 | -0.442 | **0.460** | -0.404 | 0.353 |  |  | CMC NH4+ | **0.433** | **0.528** | **0.828** | **0.700** | 0.173 | 0.526 |
|  | CMC Sea salt | -0.028 | -0.057 | 0.611 | -0.191 | 0.261 | 0.279 |  |  | CMC Sea salt | -0.041 | -0.309 | 0.112 | **-0.408** | 0.583 | 0.069 |
|  | CMC Dust | 0.189 | 0.207 | 0.331 | -0.022 | 0.031 | 0.425 |  |  | CMC Dust | 0.137 | 0.234 | 0.515 | -0.173 | 0.482 | 0.276 |
|  | CMC BC | 0.167 | 0.010 | -0.217 | **0.461** | 0.455 | **0.709** |  |  | CMC BC | **0.579** | **0.435** | 0.661 | **0.633** | **0.785** | **0.689** |
|  | PMF Factor 1 | **0.380** | 0.301 | -0.349 | **0.436** | 0.395 | 0.276 |  |  | PMF Factor 1 | 0.213 | 0.098 | 0.192 | **0.529** | 0.175 | 0.202 |
|  | PMF Factor 2 | **0.345** | 0.319 | 0.224 | 0.060 | 0.583 | 0.471 |  |  | PMF Factor 2 | **0.260** | 0.422 | -0.145 | -0.201 | 0.388 | 0.345 |
|  | PMF Factor 3 | 0.181 | 0.108 | -0.260 | -0.008 | -0.168 | 0.375 |  |  | PMF Factor 3 | **0.291** | **0.422** | **0.783** | 0.057 | 0.736 | 0.340 |
|  | PMF Factor 4 | -0.008 | 0.200 | -0.032 | 0.114 | 0.330 | 0.465 |  |  | PMF Factor 4 | **0.311** | 0.290 | **0.766** | 0.172 | 0.337 | 0.239 |
|  | PMF Factor 5 | -0.026 | -0.082 | -0.581 | -0.211 | 0.320 | 0.267 |  |  | PMF Factor 5 | -0.073 | -0.152 | -0.017 | -0.118 | **0.641** | 0.007 |

Remarks: Values in bold are different from 0 with a significance level alpha=0.05

Table S5. Relative contribution from five identified sources for each HAZE episode.

| Source contribution, µg m-3 (%) | HAZE 2011  n = 3 | HAZE 2012  n = 8 |
| --- | --- | --- |
| Factor 1: Combustion of engine oil | 5.66 (10%) | 3.71 (6%) |
| Factor 2: Mineral dust | 1.17 (2%) | 15.1 (25%) |
| Factor 3: Mixed SIA and biomass burning | 47.0 (81%) | 33.2 (56%) |
| Factor 4: Mixed traffic and industrial | 1.12 (2%) | 2.12 (4%) |
| Factor 5: Sea salt | 2.87 (5%) | 5.28 (9%) |

Table S6. Pearson correlation matrix results between chemical mass closure (CMC) components and positive matrix factorisation (PMF) factor for: a) HAZE 2011, and b) HAZE 2012 episodes. Remarks: SIA = secondary inorganic aerosol.

a) HAZE 2011

| Variables | PMF Factor 3 | CMC SO42- | CMC NH4+ | CMC K+ | CMC nss- SO42- | CMC SIA |
| --- | --- | --- | --- | --- | --- | --- |
| PMF Factor 3 | **1** | 0.899 | 0.873 | 0.915 | 0.899 | 0.888 |
| CMC SO42- |  | **1** | **0.998** | 0.647 | **1.000** | **1.000** |
| CMC NH4+ |  |  | **1** | 0.603 | **0.998** | **1.000** |
| CMC K+ |  |  |  | **1** | 0.647 | 0.627 |
| CMC nss- SO42- |  |  |  |  | **1** | **1.000** |
| CMC SIA |  |  |  |  |  | **1** |
|  |  |  |  |  |  |  |
|  | | | | | | |

b) HAZE 2012

| Variables | PMF Factor 3 | CMC SO42- | CMC NH4+ | CMC K+ | CMC nss- SO42- | CMC SIA |
| --- | --- | --- | --- | --- | --- | --- |
| PMF Factor 3 | **1** | **0.963** | **0.944** | 0.695 | **0.965** | **0.952** |
| CMC SO42- |  | **1** | **0.989** | **0.781** | **1.000** | **0.995** |
| CMC NH4+ |  |  | **1** | **0.849** | **0.988** | **0.997** |
| CMC K+ |  |  |  | **1** | **0.777** | **0.829** |
| CMC nss- SO42- |  |  |  |  | **1** | **0.995** |
| CMC SIA |  |  |  |  |  | **1** |
|  |  |  |  |  |  |  |

Values in bold are different from 0 with a significance level alpha=0.05.

Table S7. HAZE episodes results for Pearson correlation matrices between PM2.5 mass, chemical mass closure (CMC) components and positive matrix factorisation (PMF) factors identified towards: a) meteorological parameters, and b) gaseous parameters. Remarks: BC = black carbon while PMF factor details are as follows: factor 1= combustion of engine oil; factor 2= mineral dust; factor 3= mixed secondary inorganic aerosol (SIA) and biomass burning; factor 4= mixed traffic and industrial; and factor 5= sea salt. For meteorological parameters, API is air pollution index; T = temperature; RH = relative humidity; WS = wind speed; and WD = wind direction.

| a) | Variables | HAZE 2011 | HAZE 2012 |  |  | Variables | HAZE 2011 | HAZE 2012 |
| --- | --- | --- | --- | --- | --- | --- | --- | --- |
| API | PM2.5 mass | 0.082 | 0.613 |  | WS | PM2.5 mass | -0.921 | -0.432 |
|  | SO42- | 0.491 | **0.736** |  |  | SO42- | -0.673 | -0.642 |
|  | NO3- |  | -0.313 |  |  | NO3- |  | **0.759** |
|  | NH4+ | 0.539 | 0.670 |  |  | NH4+ | -0.630 | -0.567 |
|  | Sea salt | 0.386 | -0.204 |  |  | Sea salt | -0.755 | 0.054 |
|  | Dust | 0.145 | -0.298 |  |  | Dust | -0.894 | 0.385 |
|  | BC | 0.027 | 0.245 |  |  | BC | -0.941 | -0.009 |
|  | Factor 1 | 0.990 | 0.093 |  |  | Factor 1 | 0.176 | 0.170 |
|  | Factor 2 | **1** | -0.231 |  |  | Factor 2 | **-1** | 0.413 |
|  | Factor 3 | 0.061 | 0.611 |  |  | Factor 3 | -0.929 | -0.658 |
|  | Factor 4 | -0.530 | -0.075 |  |  | Factor 4 | -0.972 | 0.063 |
|  | Factor 5 | **1** | -0.370 |  |  | Factor 5 | 0.309 | 0.234 |
|  |  |  |  |  |  |  |  |  |
| T | PM2.5 mass | 0.387 | -0.188 |  | WD | PM2.5 mass | 0.600 | 0.427 |
|  | SO42- | 0.737 | -0.612 |  |  | SO42- | 0.880 | 0.316 |
|  | NO3- |  | 0.287 |  |  | NO3- |  | 0.405 |
|  | NH4+ | 0.774 | -0.517 |  |  | NH4+ | 0.905 | 0.334 |
|  | Sea salt | 0.653 | 0.693 |  |  | Sea salt | 0.818 | -0.110 |
|  | Dust | 0.445 | **0.863** |  |  | Dust | 0.650 | 0.095 |
|  | BC | 0.336 | 0.371 |  |  | BC | 0.555 | 0.347 |
|  | Factor 1 | 0.985 | 0.288 |  |  | Factor 1 | 0.913 | 0.713 |
|  | Factor 2 | **1** | **0.864** |  |  | Factor 2 | **1** | 0.243 |
|  | Factor 3 | 0.367 | -0.304 |  |  | Factor 3 | 0.583 | 0.284 |
|  | Factor 4 | -0.241 | -0.563 |  |  | Factor 4 | 0.003 | 0.070 |
|  | Factor 5 | 0.952 | 0.751 |  |  | Factor 5 | 0.849 | -0.111 |
|  |  |  |  |  |  |  |  |  |
| RH | PM2.5 mass | -0.715 | 0.317 |  | Rainfall | PM2.5 mass | **-1** | -0.177 |
|  | SO42- | -0.942 | **0.733** |  |  | SO42- | **-1** | 0.064 |
|  | NO3- |  | -0.540 |  |  | NO3- |  | -0.244 |
|  | NH4+ | -0.959 | 0.637 |  |  | NH4+ | **-1** | -0.013 |
|  | Sea salt | -0.896 | -0.490 |  |  | Sea salt | **-1** | -0.211 |
|  | Dust | -0.758 | **-0.779** |  |  | Dust | **-1** | -0.389 |
|  | BC | -0.675 | -0.248 |  |  | BC | **-1** | -0.512 |
|  | Factor 1 | -0.841 | -0.214 |  |  | Factor 1 | **1** |  |
|  | Factor 2 | **-1** | **-0.786** |  |  | Factor 2 |  | -0.440 |
|  | Factor 3 | -0.700 | 0.568 |  |  | Factor 3 | **-1** | 0.022 |
|  | Factor 4 | -0.155 | 0.485 |  |  | Factor 4 | **-1** | 0.295 |
|  | Factor 5 | -0.759 | -0.567 |  |  | Factor 5 | **1** | -0.152 |

| b) | Variables | HAZE 2011 | HAZE 2012 |  |  | Variables | HAZE 2011 | HAZE 2012 |
| --- | --- | --- | --- | --- | --- | --- | --- | --- |
| CO | PM2.5 mass | 0.541 | **0.907** |  | NOX | PM2.5 mass | 0.577 | 0.319 |
|  | SO42- | 0.843 | **0.797** |  |  | SO42- | 0.866 | -0.068 |
|  | NO3- |  | -0.180 |  |  | NO3- |  | 0.403 |
|  | NH4+ | 0.872 | **0.819** |  |  | NH4+ | 0.892 | 0.028 |
|  | Sea salt | 0.775 | -0.028 |  |  | Sea salt | 0.802 | 0.227 |
|  | Dust | 0.594 | -0.014 |  |  | Dust | 0.629 | 0.552 |
|  | BC | 0.494 | 0.691 |  |  | BC | 0.532 | 0.604 |
|  | Factor 1 | 0.940 | 0.461 |  |  | Factor 1 | 0.924 | 0.797 |
|  | Factor 2 | **1** | 0.111 |  |  | Factor 2 | **1** | 0.677 |
|  | Factor 3 | 0.523 | 0.772 |  |  | Factor 3 | 0.560 | 0.299 |
|  | Factor 4 | -0.069 | -0.334 |  |  | Factor 4 | -0.025 | -0.548 |
|  | Factor 5 | 0.885 | -0.314 |  |  | Factor 5 | 0.864 | 0.126 |
|  |  |  |  |  |  |  |  |  |
| O3 | PM2.5 mass | -0.169 | 0.706 |  | NO | PM2.5 mass | 0.492 | -0.493 |
|  | SO42- | 0.259 | **0.917** |  |  | SO42- | 0.811 | **-0.778** |
|  | NO3- |  | -0.391 |  |  | NO3- |  | 0.336 |
|  | NH4+ | 0.313 | **0.919** |  |  | NH4+ | 0.842 | **-0.715** |
|  | Sea salt | 0.145 | -0.326 |  |  | Sea salt | 0.737 | 0.394 |
|  | Dust | -0.105 | -0.505 |  |  | Dust | 0.546 | 0.625 |
|  | BC | -0.222 | 0.271 |  |  | BC | 0.443 | -0.034 |
|  | Factor 1 | 0.924 | 0.451 |  |  | Factor 1 | 0.958 | 0.142 |
|  | Factor 2 | **1** | -0.403 |  |  | Factor 2 | **1** | 0.622 |
|  | Factor 3 | -0.189 | **0.856** |  |  | Factor 3 | 0.473 | -0.710 |
|  | Factor 4 | -0.724 | 0.621 |  |  | Factor 4 | -0.126 | -0.443 |
|  | Factor 5 | 0.967 | -0.500 |  |  | Factor 5 | 0.910 | 0.520 |
|  |  |  |  |  |  |  |  |  |
| SO2 | PM2.5 mass | 0.979 | 0.665 |  | NO2 | PM2.5 mass | 0.663 | **0.898** |
|  | SO42- | 0.974 | 0.545 |  |  | SO42- | 0.915 | **0.798** |
|  | NO3- |  | -0.104 |  |  | NO3- |  | 0.059 |
|  | NH4+ | 0.960 | 0.615 |  |  | NH4+ | 0.937 | **0.832** |
|  | Sea salt | 0.994 | 0.147 |  |  | Sea salt | 0.862 | -0.193 |
|  | Dust | 0.990 | 0.141 |  |  | Dust | 0.710 | -0.101 |
|  | BC | 0.966 | 0.652 |  |  | BC | 0.621 | 0.694 |
|  | Factor 1 | 0.416 | 0.741 |  |  | Factor 1 | 0.877 | 0.437 |
|  | Factor 2 | **1** | 0.263 |  |  | Factor 2 | **1** | 0.037 |
|  | Factor 3 | 0.975 | 0.600 |  |  | Factor 3 | 0.647 | 0.623 |
|  | Factor 4 | 0.664 | 0.004 |  |  | Factor 4 | 0.085 | -0.117 |
|  | Factor 5 | 0.288 | 0.027 |  |  | Factor 5 | 0.803 | -0.463 |

Values in bold are different from 0 with a significance level alpha=0.05

Figure S1. Seasonal plot for a) SW, b) INT.2, c) NE, and d) INT.1 pertaining to: i) regional synoptic wind field plotted for 925 hPa (500 m); ii) biomass fire hotspot; and iii) wind rose at the sampling site.

Figure S2. Correlations between cations and anions of PM2.5 on a seasonal and annual basis, each with respective linear regression equations. The 1:1 line is given for comparison.

Figure S3. Seasonal variation of enrichment factor (EF) in the trace element of PM2.5.

Remarks:

EF category = Anthropogenic: EF > 4; Mixed: 2 < EF < 4; Crustal: EF < 2.

Degree of enrichment = Highly enriched: EF ≥ 1000; Moderately enriched: 100 < EF < 1000; Slightly enriched:10 < EF < 100; and Minimally enriched: EF < 10.

Figure S4. Haze episodes plot a) 2011 HAZE, and b) 2012 HAZE of i) synoptic wind field plotted on 925 hPa (500 m); ii) biomass fire hotspot with 48 h backwards trajectories at the releasing 925 hPa (500 m) with 6 h trajectory intervals; and iii) wind rose at the sampling site.

Figure S5. Regression plot between calculated chemical mass closure (CMC; only identified components) and measured PM2.5 mass.

Figure S6. Comparison results between chemical mass closure (CMC) and positive matrix factorisation (PMF) results on three selected factors: a) dust; b) secondary inorganic aerosol (SIA) and biomass burning; and c) sea salt; where i) Correlations between CMC and PMF of PM2.5 are on a seasonal and annual basis, each with respective linear regression equations. The 1:1 line is given for comparison; and ii) time series of the mass concentration predicted by both CMC and PMF approach.

**Reference**

Squizzato, S., Masiol, M., Brunelli, A., Pistollato, S., Tarabotti, E., Rampazzo, G., and Pavoni, B.: Factors determining the formation of secondary inorganic aerosol: a case study in the Po Valley (Italy), Atmos. Chem. Phys., 13, 1927-1939, 10.5194/acp-13-1927-2013, 2013.
