# Supplementary material for: Seasonal variability of PM 2.5 composition and sources in the Klang Valley urban-industrial environment
Source: Copernicus journal article supplement (doi:10.5194/acp-16-5357-2016), 2016-04-29
Supplement: Supplementary file 2 [file acp-16-5357-2016-supplement.zip]

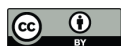

## *Supplement of*

# **Seasonal variability of PM<sub>2.5</sub> composition and sources in the Klang Valley urban-industrial environment**

**Norhaniza Amil et al.**

*Correspondence to:* Mohd Talib Latif (talib@ukm.my)

- acp-16-5357-2016-supplement-title-page.pdf
- acp-2015-515-SUPPLEMENT
  - acp-2015-515-SUPPLEMENT- 20160415 - without highlights A - with figures.pdf
  - acp-2015-515-SUPPLEMENT- 20160415 - without highlights A - without figures.doc
  - fs01.png
  - fs02.eps
  - fs03.eps
  - fs04.png
  - fs05.eps
  - fs06.eps

The copyright of individual parts of the supplement might differ from the CC-BY 3.0 licence.
